# Supplementary material for: Reliability and validity of the multi-point method and the 2-point method’s variations of estimating the one-repetition maximum for deadlift and back squat exercises
Source: PeerJ. 2022 Mar 2;10:e13013. doi: 10.7717/peerj.13013 (PMC8898007; doi:10.7717/peerj.13013)
Supplement: Supplemental Information 1 [file peerj-10-13013-s001.xlsx]

## Sheet: Sayfa1
Player ID	Deadlift Real RM	1. Session Deadlift Multiple	2. Session Deadlift Multiple	1. Session Deadlift %40-60	2. Session Deadlift %40-60	1. Session Deadlift %40-80	2. Session Deadlift %40-80	1. Session Deadlift %40-90	2. Session Deadlift %40-90	1. Session Deadlift %60-80	2. Session Deadlift %60-80	1. Session Deadlift %60-90	2. Session Deadlift %60-90
Player 1	180	173.73	174.658	184.077	182.588	178.964	175.556	170.435	173.636	177.307	173.516	169.523	172.819
Player 2	225	239.983	239.026	343.33	362.724	230.433	228.583	214.231	215	214.708	212	242	242
Player 3	145	136.237	156.966	145.713	141.814	179.995	171	151.762	153.6	192.889	190.769	153	156.431
Player 4	145	154.988	142.861	176.25	184.996	160.294	163.123	153	152.649	155.644	157	150.7	149.8
Player 5	160	176.321	175.455	252.296	252.296	185.196	184.728	173.6	173.6	172.397	169.2	166.25	166.25
Player 6	100	101.67	101.977	155	153.33	109	109.746	99.4789	99.6522	100.716	101.479	97.1774	95.7852
Player 7	230	229.225	229.265	399.313	402.724	241	242.65	228.159	227.678	221.153	222.313	220.084	219.66
Player 8	200	208.6	215.2	238.264	233.329	214.817	213.822	202.969	204.319	207.745	207.745	200.002	201.6
Player 9	140	136.349	136.286	114	114.67	138.573	138.13	139.427	139.241	158.113	155.556	144.968	144.373
Player 10	185	179.473	179.785	199.6	191.666	177.418	178.568	180.397	180.198	173.157	175.625	179.024	179.3
Player 11	185	193.02	192.276	236.667	238.887	203.925	202.557	188.427	187.935	193.125	191.2	183.078	182.5
Player 12	140	140.121	140.001	173	177.897	150.227	148.997	135.964	136.316	142	139.617	131.67	131.67
